# Supplementary material for: Mesoscale columnar-like organization of face and body areas
Source: Research Square preprint supplement (doi:10.21203/rs.3.rs-3388353/v1), 2023-10-20
Supplement: Supplementary file 1 [file becdb3e1990db82e904102dc.docx]

# Mesoscale columnar-like organization of face and body areas

X. Li, Q. Zhu, I.D. Popivanov, R. Vogels, W. Vanduffel

**Extended Data**

**Extended Data Fig. 1 Face area ML contains three mesoscale functionally segregated units with different categorical selectivity profiles and segregated inter-hemispheric functional connections in subject M2.** Results are computed and shown as in Fig. 1.

**Extended Data Fig. 2 Body area MSB contains three mesoscale functionally segregated units with different categorical selectivity profiles and segregated inter-hemispheric functional connections in subject M1.** Results are computed and shown as in Fig. 1.
